# Supplementary material
Source: MDPI journal article supplement (https://www.mdpi.com/2076-3417/12/13/6825)
Supplement: s1 [file s1]

# **Zinc(II) Sulfanyltribenzoporphyrazines with Bulky Peripheral Substituents — Synthesis, Photophysical Characterization, and Potential Photocytotoxicity**

**Patrycja Koza<sup>1,2\*</sup>, Tomasz Koczorowski<sup>1</sup>, Dariusz T. Mlynarczyk<sup>1</sup>, Tomasz Goslinski<sup>1\*</sup>**

<sup>1</sup> Chair and Department of Chemical Technology of Drugs, Poznan University of Medical Sciences, Grunwaldzka 6, 60-780 Poznań, Poland; patrycja.koza@student.ump.edu.pl (P.K.); tkoczorowski@ump.edu.pl (T.K.); mlynarczykd@ump.edu.pl (D.T.M.); tomasz.goslinski@ump.edu.pl (T.G.)

<sup>2</sup> Doctoral School, Poznan University of Medical Sciences, Bukowska 70, 60-812 Poznań, Poland

\*Correspondence: patrycja.koza@student.ump.edu.pl (P.K.), tomasz.goslinski@ump.edu.pl (T.G.)

## **Supplementary Materials**

NMR data for 22,23-bis[4-(3,5-dibutoxycarbonylphenoxy)butylthio]-tribenzo[*b,g,l*]porphyrinato zinc (II) (**6**)

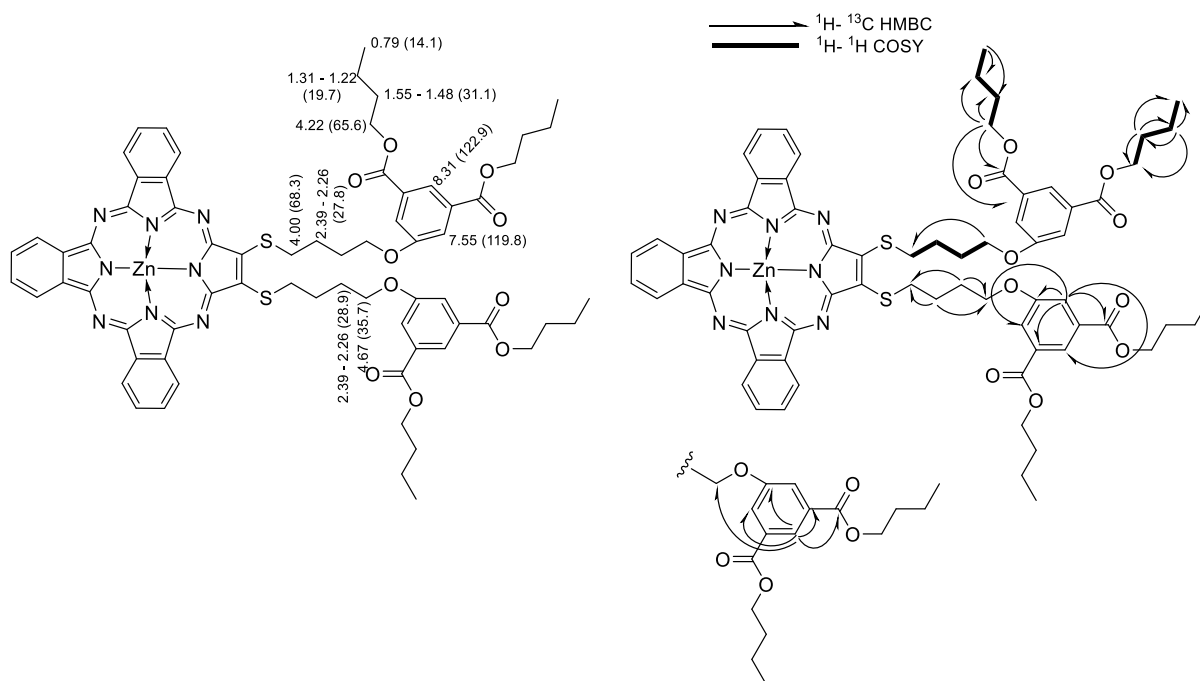

**Figure S1.** NMR data of **6**: <sup>1</sup>H and (<sup>13</sup>C) chemical shift values [ppm] and key correlations observed in NMR spectra. Bold lines: <sup>1</sup>H-<sup>1</sup>H COSY; Arrows: <sup>1</sup>H-<sup>13</sup>C HMBC.

**Table S1.** <sup>1</sup>H and <sup>13</sup>C NMR data obtained for **6** including key correlations determined from <sup>1</sup>H-<sup>1</sup>H COSY, <sup>1</sup>H-<sup>13</sup>C HSQC and <sup>1</sup>H-<sup>13</sup>C HMBC spectra.

| $\delta_{\text{H}}$ (ppm) | Multiplicity ( $J_{\text{H-H}}$ in Hz) | <sup>1</sup> H- <sup>13</sup> C HSQC $\delta_{\text{C}}$ (ppm) | <sup>1</sup> H- <sup>13</sup> C HMBC $\delta_{\text{C}}$ (ppm) |
|---------------------------|----------------------------------------|----------------------------------------------------------------|----------------------------------------------------------------|
| 9.65 – 9.70               | m                                      | 123.4                                                          | 130.9, 131.1                                                   |
| 9.58                      | 2 × d (8)                              | 122.9                                                          | 130.4                                                          |
| 8.31                      | s                                      | 122.9                                                          | 140.1, 140.2, 165.7                                            |
| 8.26                      | 2 × d (5.5)                            | 130.9, 131.1                                                   | 119.6, 139.4                                                   |
| 8.18 – 8.23               | m                                      | 130.4                                                          | 122.9, 123.4, 138.7                                            |
| 7.55                      | s                                      | 119.8                                                          | 122.9, 132.6, 159.6, 165.7                                     |
| 4.67                      | t (7)                                  | 35.7                                                           | 27.8, 138.7                                                    |
| 4.22                      | t (7)                                  | 65.6                                                           | 19.7, 31.1, 165.7                                              |
| 4.00                      | t (6)                                  | 68.3                                                           | 27.8, 28.9                                                     |
| 2.26 – 2.39               | m                                      | 27.8 28.9                                                      | 35.7, 68.3                                                     |
| 1.48 – 1.55               | m                                      | 31.1                                                           |                                                                |
| 1.22 – 1.31               | m                                      | 19.7                                                           | 14.1, 19.7, 65.6                                               |
| 0.79                      | t (7)                                  | 14.1                                                           | 19.7, 31.1                                                     |

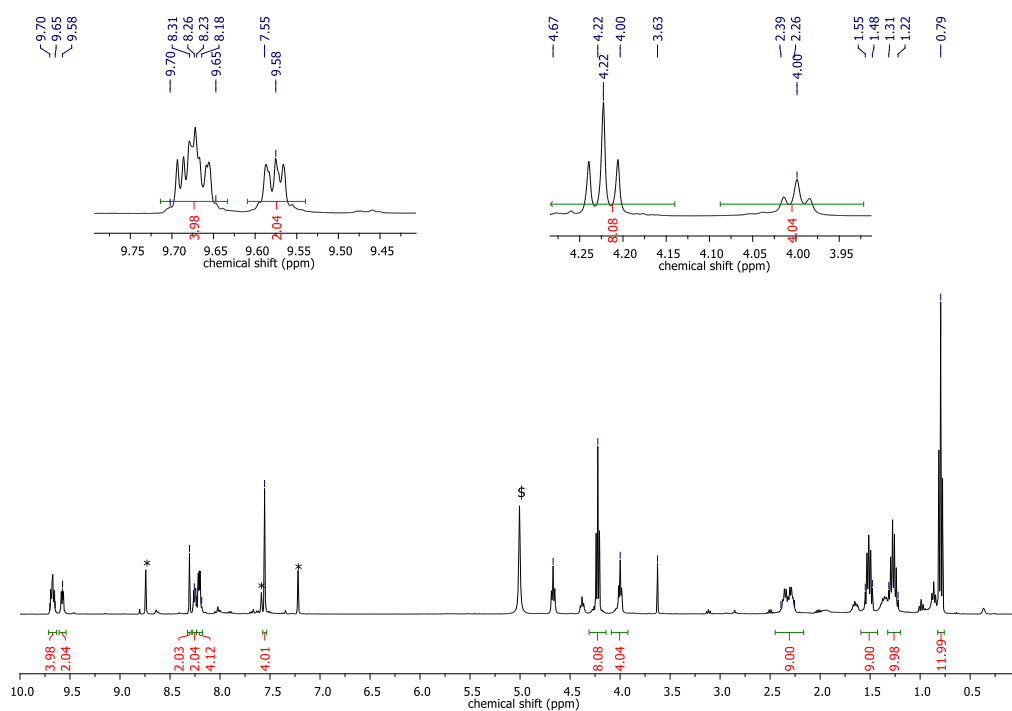

<sup>1</sup>H NMR spectrum of **6**. The symbols \* and \$ indicate pyridine-*d*<sub>5</sub> and water residual peaks, respectively.

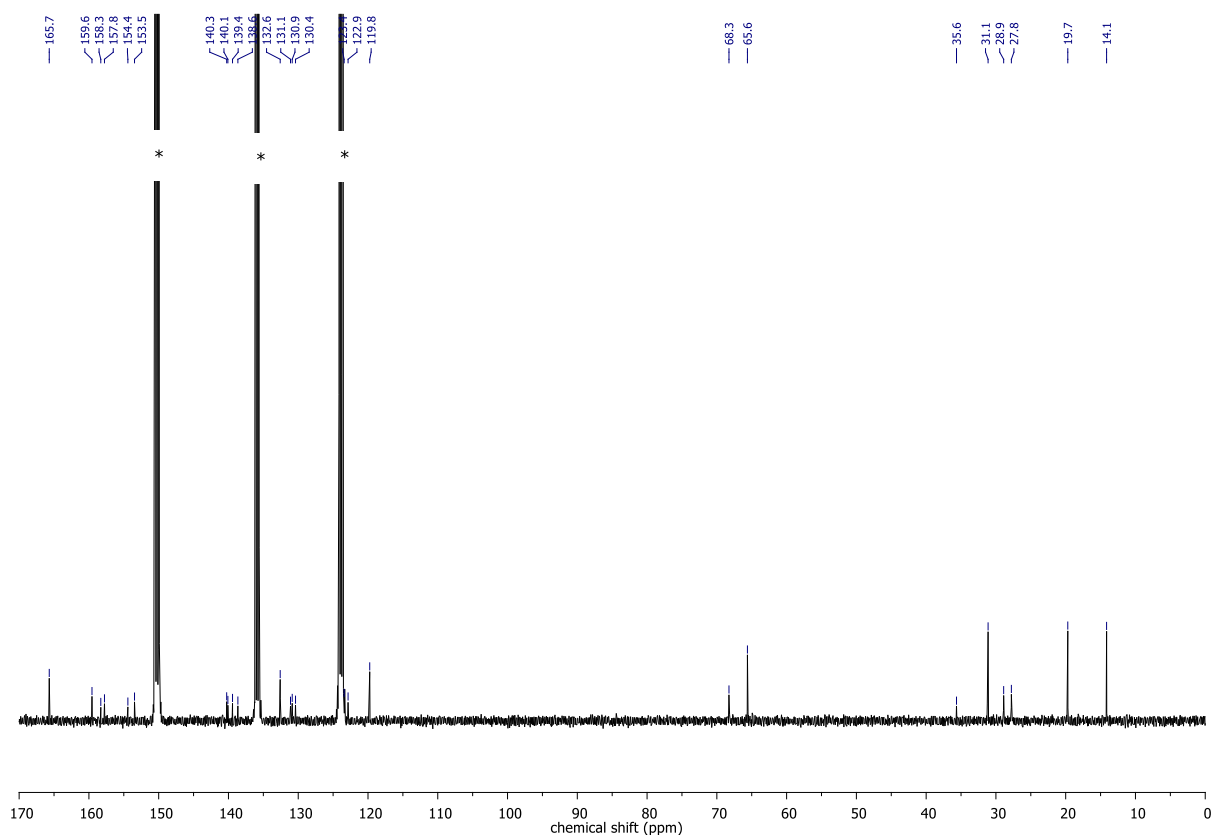

<sup>13</sup>C NMR spectrum recorded for **6**. The symbol \* indicates pyridine-*d*<sub>5</sub> residual peaks.

NMR data for 22,23-bis[4-[3,5-di(hydroxymethyl)phenoxy]butylthio]tribenzo[*b,g,l*]porphyrizinato zinc (II) **7**

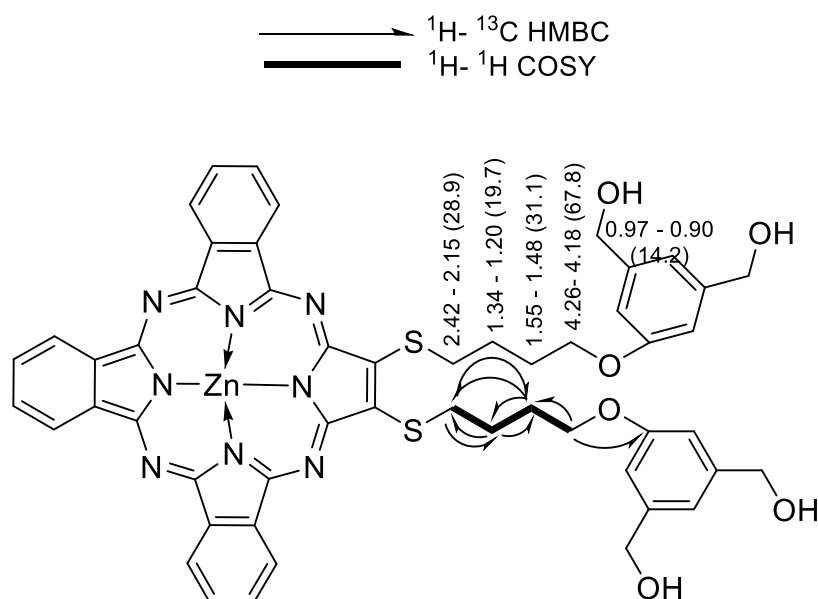

**Figure S2.** NMR data of **7**:  $^1\text{H}$  and ( $^{13}\text{C}$ ) chemical shift values [ppm] and key correlations observed in NMR spectra. Bold lines:  $^1\text{H}$ - $^1\text{H}$  COSY; Arrows:  $^1\text{H}$ - $^{13}\text{C}$  HMBC.

**Table S2.**  $^1\text{H}$  and  $^{13}\text{C}$  NMR data obtained for **7** including key correlations determined from  $^1\text{H}$ - $^1\text{H}$  COSY,  $^1\text{H}$ - $^{13}\text{C}$  HSQC and  $^1\text{H}$ - $^{13}\text{C}$  HMBC spectra.

| $\delta_{\text{H}}$ (ppm)                                                  | Multiplicity ( $J_{\text{H-H}}$ in Hz) | $^1\text{H}$ - $^{13}\text{C}$ HSQC $\delta_{\text{C}}$ (ppm) | $^1\text{H}$ - $^{13}\text{C}$ HMBC $\delta_{\text{C}}$ (ppm) |
|----------------------------------------------------------------------------|----------------------------------------|---------------------------------------------------------------|---------------------------------------------------------------|
| 9.46 – 9.58                                                                | m                                      | 123.0, 124.5                                                  | 14.2, 130.6, 130.7, 139.4                                     |
| 8.19 – 8.41                                                                | m                                      | 122.5, 122.7                                                  | 19.7, 65.8, 139.4, 140.1, 140.3, 165.5                        |
| 7.35 – 7.67                                                                | m                                      | 119.5, 119.9                                                  | 122.5, 122.7, 132.3, 159.3, 159.7, 165.5, 165.8               |
| 4.18 – 4.26                                                                | m                                      | 67.8                                                          | 65.6, 68.3                                                    |
| 2.15 – 2.42                                                                | m                                      | 27.9, 28.9, 29.1                                              | 19.7, 31.1, 165.5, 165.8                                      |
| 1.48 – 1.55                                                                | m                                      | 31.2                                                          | 14.2, 19.7, 65.6, 155.0                                       |
| 1.20 – 1.34                                                                | m                                      | 19.7                                                          | 14.2, 31.1, 65.6                                              |
| 0.90 - 0.97                                                                | m                                      | 14.2                                                          | 19.7, 31.1                                                    |
| Other carbon atoms: 160.7, 160.2, 159.4, 136.5, 133.4, 132.8, 131.7, 63.9. |                                        |                                                               |                                                               |

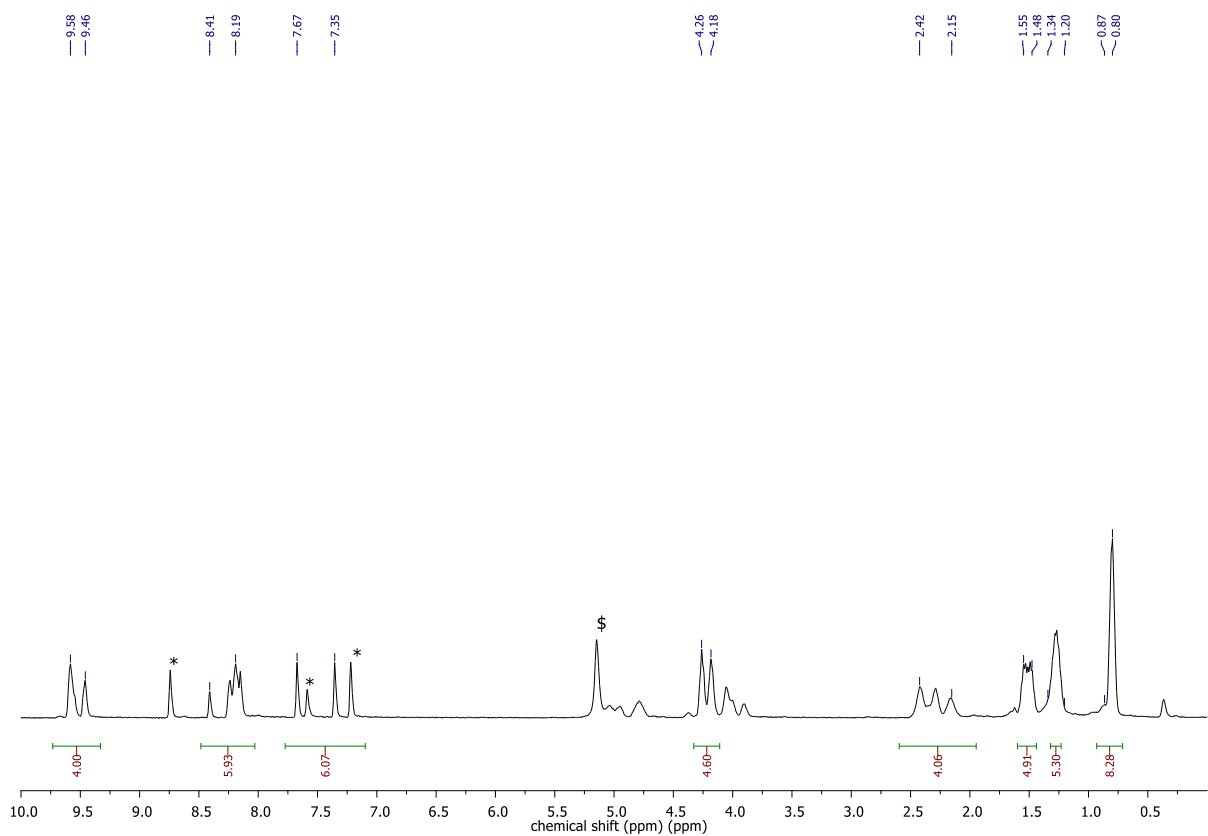

$^1\text{H}$  NMR spectrum of **7**. The symbols \* and \$ indicate pyridine- $d_5$  and water residual peaks, respectively.

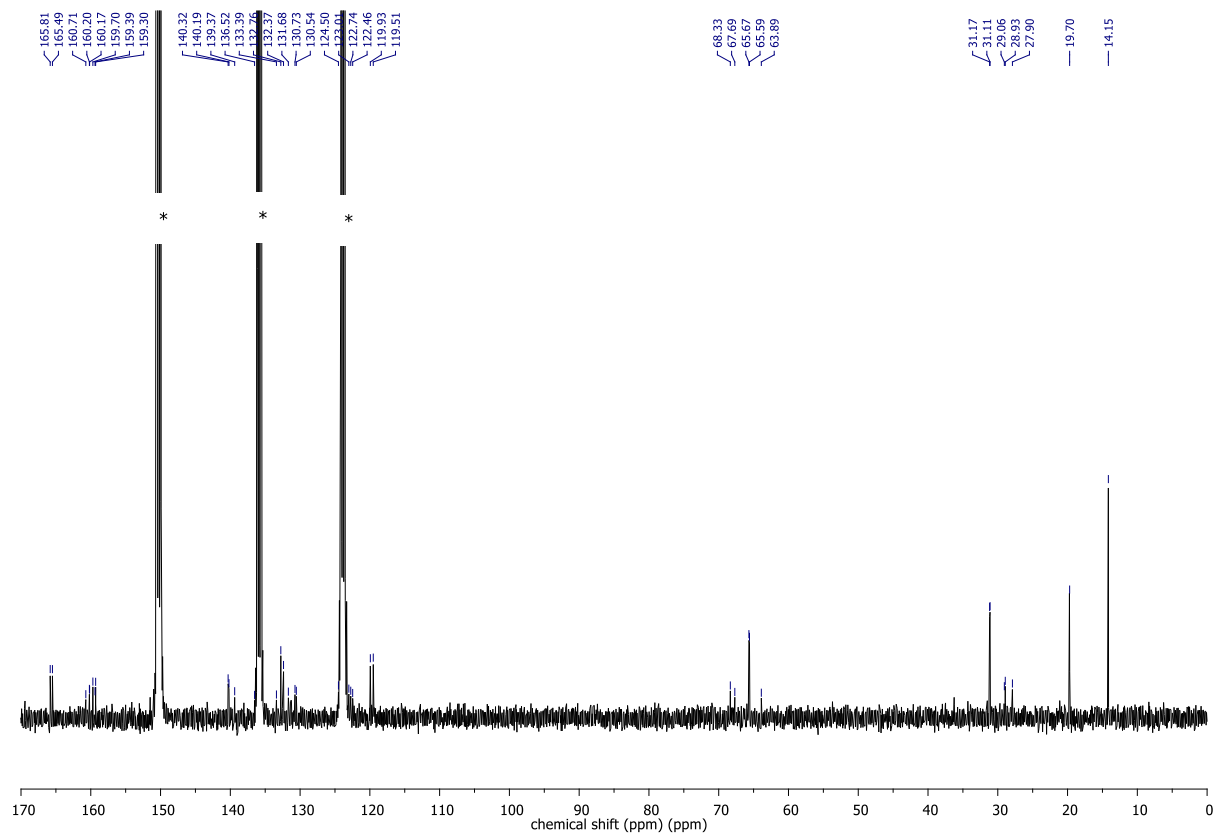

$^{13}\text{C}$  NMR spectrum recorded for **7**. The symbol \* indicates pyridine- $d_5$  residual peaks.
